# Supplementary material
Source: HighWire-hosted journal article supplement (http://www.ghspjournal.org/highwire/filestream/1953/field_highwire_adjunct_files/0/17-00057-Dutta-Supplement1.pdf)
Supplement: 17-00057-Dutta-Supplement1.pdf [file 17-00057-Dutta-Supplement1.pdf]

---

## SUPPLEMENT 1: Indicator List

---

| No. | Indicator |
|-----|-----------|
|-----|-----------|

---

### Family Planning Coverage

- 1 Current method mix: % for each method, married women and all women
- 2 Projected method mix (to 2020): % for each method, all women
- 3 Current contraceptive prevalence rate, modern methods (mCPR): married women and all women
- 4 Projected mCPR (to 2020): all women
- 5 Current unmet need: married women and all women
- 6 Projected unmet need (to 2020): all women
- 7 mCPR by income or wealth quintile, latest year
- 8 mCPR by geographic area, latest year
- 9 mCPR by ethnic group or indigenous/nonindigenous identity, latest year
- 10 Total fertility rate, latest year

---

### Family Planning Financing

- 11 Percentage of all FP commodities funded by source (government, households/OOP, insurers, external sources—specify by donor)
- 12 Estimated split (%) of in-country procurement and supply chain management costs by source (government, donor, other)
- 13 Estimated contribution (%) from external sources to FP service delivery (HRH, demand creation, other non-PSM)
- 14 Estimated financing gap for FP by year (to 2020), beginning from latest year available
- 15 Percentage of FP services (supply + information) for current users received by sector (public, private-not-for-profit, private-for-profit)

---

### Health Financing

- 16 National Health Accounts disaggregation of total health expenditure (THE) by source, latest year available from in-country report
- 17 THE per capita, latest available from in-country report or calculated

- 18 National health insurance coverage (% of population) by insurance scheme (social, community, national, private)
- 19 Health insurance coverage (% of population) for key government-supported schemes, by wealth quintile
- 20 Health insurance coverage (% of population) for key government-supported schemes, by geographic area [aligned with indicator #8]
- 21 User fees policy in public sector facilities (universally exempt; means-based exemption or waiver; other), by primary vs. hospital level
- 22 Approximate user fee (US\$) for 1 outpatient visit, relevant to FP method service delivery, in 2016
- 23 Catastrophic health expenditure incidence, latest year available [exact definition will vary by country-specific data reported]
- 24 Government allocation to health (with on-budget support from donors) as % of total government expenditure, latest fiscal year
- 25 Major health insurance scheme #1: *characteristics* (e.g., number of members and beneficiaries, purchasing modality, type of providers)
- 26 Major health insurance scheme #2: *characteristics* (e.g., number of members and beneficiaries, purchasing modality, type of providers)
- 27 Major health insurance scheme #1: *contributions* (e.g., payroll-based taxes and % contributed by employer and/or employee, government subsidies, other)
- 28 Major health insurance scheme #2: *contributions* (e.g., payroll-based taxes and % contributed by employer and/or employee, government subsidies, other)
- 29 Major health insurance scheme #1: *benefits package* (e.g., characteristics of coverage: up to secondary or tertiary; based on a positive list, negative list or both; inclusion of preventive and promotive health care)
- 30 Major health insurance scheme #2: *benefits package* (e.g., characteristics of coverage: up to secondary or tertiary; based on a positive list, negative list or both; inclusion of preventive and promotive health care)

---

## Family Planning Inclusion in UHC-Oriented Schemes

---

- 31 Status of inclusion of modern contraceptive methods in major health insurance scheme #1 (included, included with caveats [specify], not included)
- 32 Status of inclusion of modern contraceptive methods in major health insurance scheme #2 (included, included with caveats [specify], not included)
- 33 Co-pay or other user fee for accessing FP under major health insurance scheme #1, by method if so disaggregated; specifics for tubal ligation and vasectomy
- 34 Co-pay or other user fee for accessing FP under major health insurance scheme #2, by method if so disaggregated; specifics for tubal ligation and vasectomy

Fagan T, Dutta A, Rosen J, Olivetti A, Klein K. Family planning in the context of Latin America's universal health coverage agenda. *Glob Health Sci Pract.* 2017;5(3). <https://doi.org/10.9745/GHSP-D-17-00057>

- 35 Cost characteristics of FP services for uninsured population accessing care from public sector (free, partially subsidized, unsubsidized [must purchase OOP])
  - 36 Specific modern methods included/excluded from public sector provision (for uninsured population): list of methods
  - 37 Methods available with implicit or explicit subsidy in retail outlets due to social marketing, and level of subsidy vs. equivalent unsubsidized product
- 

Abbreviations: FP, family planning; HRH, human resources for health; mCPR, modern contraceptive prevalence rate; OOP, out of pocket; PSM, Procurement and Supply Management; THE, total health expenditure; UHC, universal health coverage.
